# Supplementary material
Source: Springer Nature journal article supplement (https://www.springermedizin.de/resource/supplementary/13012_2009_307_MOESM2_ESM.pdf/9629684)
Supplement: MOESM2 [file 9629684]

a) *Planned change of life habit:*

Evidence-based consultation, in-service and intervention on youth development, behaviour, and health issues. For example: nutrition, physical activities, smoking, etc.

b) *Planned change of life conditions:*

- Health services (preventive and curative) for students and school staff\*
- Involvement in physical and social environment of the school:
  - School committees
  - Local representation on the regional elementary school nurses' board
  - Collaboration with stakeholders: educational, municipal, NGO, private sector
  - Planning, coordination, and participation in the evaluation of HPS projects
  - Development of public policies favourable to health of 5 to 12 year olds
  - Development of school nursing policies
  - Development of research questions regarding youth health and school nurse practice
  - Development of a school health-promotion interventions registry
  - Encourage proactive involvement of students and their families in projects and interventions
  - Evidence-based consultation, in-service and intervention
  - Marketing of the school nurse's role to students, families, school, community, etc.

\*Screening and follow-up of immunization, but delegation of immunization to nursing aids
